# Supplementary material for: RNA sequencing of early round goby embryos reveals that maternal experiences can shape the maternal RNA contribution in a wild vertebrate
Source: PubMed Central journal article supplement (PMC5863367; doi:10.1186/s12862-018-1132-2), 2018-03-22

**Figure S2. Parameters used for correlation analysis.**

**RNA sequencing of early round goby embryos reveals that maternal experiences can shape the maternal RNA contribution in a wild vertebrate**

Irene Adrian-Kalchhauser, Jean-Claude Walser, Michaela Schwaiger, Patricia Burkhardt-Holm

“Pre-mean”/“Pre-min”/“Pre-max”/“Pre-median” = mean/minimum/maximum/median temperature experienced by the mother in the last five days before oviposition.

“Pre-interval” = temperature interval experienced by the mother in the last five days before oviposition.

“Day-mean”/“Day-min”/“Day-max” = mean/minimum/maximum temperature recorded on the sampling day.

“Cleavage” = number of completed cleavage divisions.

“Genetics” = genetic dissimilarity of the samples.

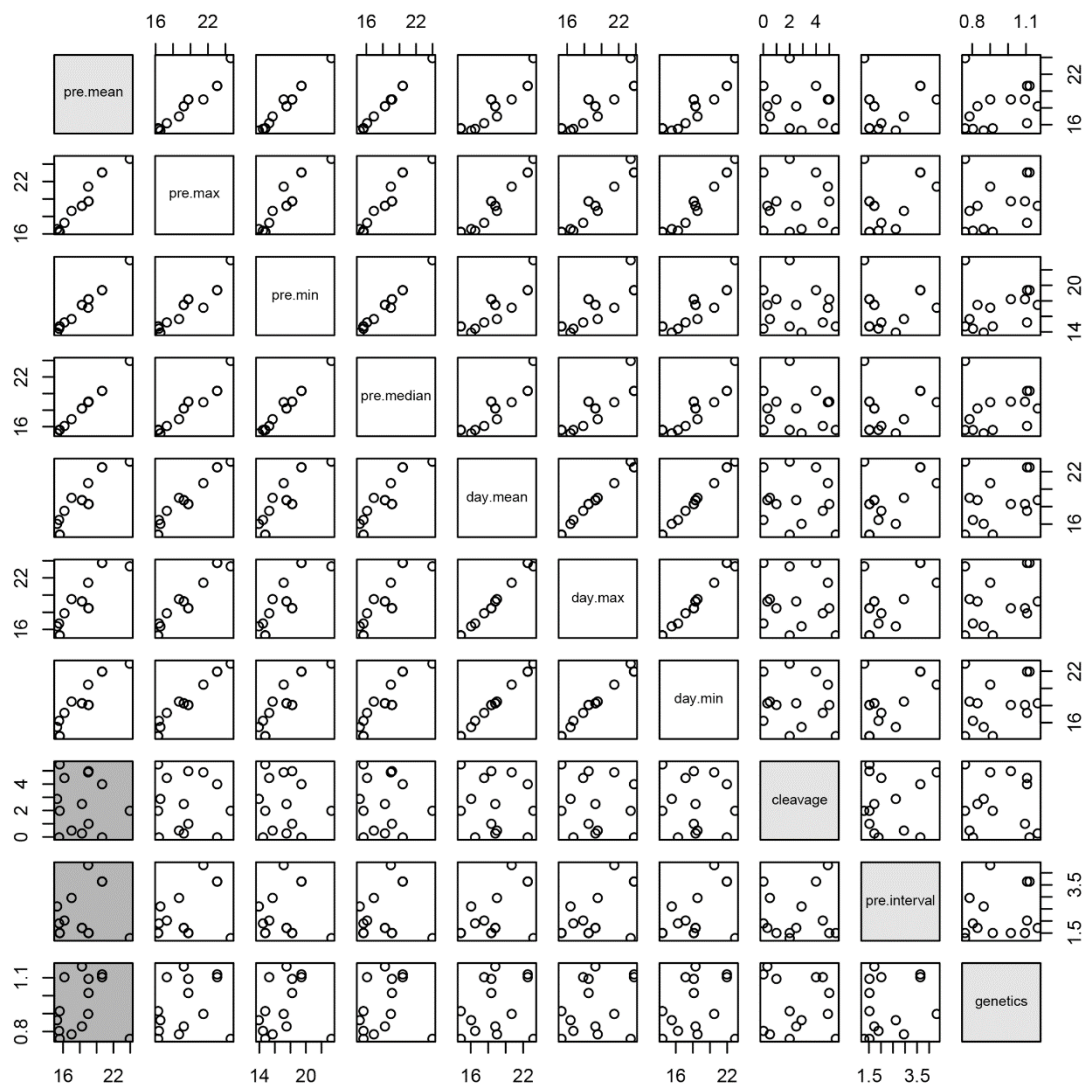

Supplement: 12862_2018_1132_MOESM4_ESM.pdf [file 12862_2018_1132_MOESM4_ESM.pdf]
